# Supplementary material for: Hollow carbon nanospheres derived from biomass by-product okara for imaging-guided photothermal therapy of cancers
Source: Royal Society of Chemistry journal article supplement (doi:10.1039/c8tb02858c), 2019-01-01
Supplement: c8tb02858c1.pdf [file c8tb02858c1.pdf]

*Electronic Supplementary Information*

## **Hollow Carbon Nanospheres Derived from Biomass By-product Okara for Imaging-guided Photothermal Therapy of Cancers**

Yangziwan Weng,<sup>ab</sup> Shanyue Guan,<sup>\*a</sup> Li Wang,<sup>ab</sup> Xiaozhong Qu<sup>\*b</sup> and Shuyun Zhou<sup>\*a</sup>

- a. Key Laboratory of Photochemical Conversion and Optoelectronic Materials, Technical Institute of Physics and Chemistry, Chinese Academy of Sciences, Beijing, 100190, China.*
- b. College of Materials Science and Opto-Electronic Technology, University of Chinese Academy of Sciences, Beijing 100049, China.*

E-mail: guanshanyue@mail.ipc.ac.cn (S.G.); quxz@iccas.ac.cn (X.Q.);  
zhou\_shuyun@mail.ipc.ac.cn (S.Z.).

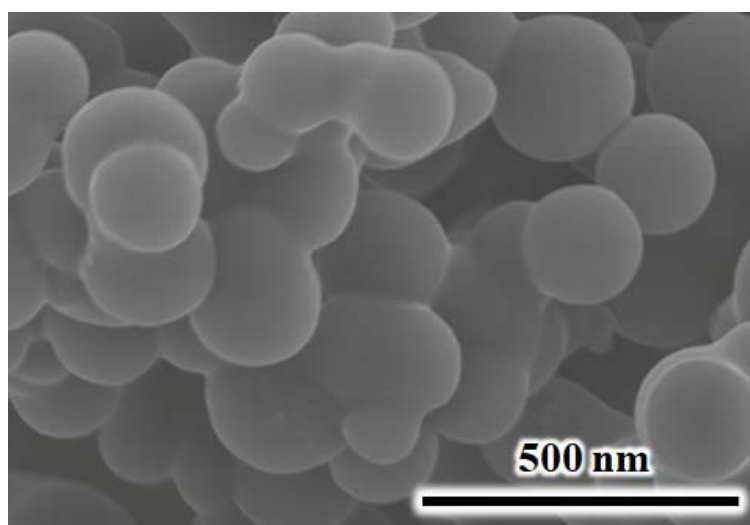

Figure S1. SEM image of HCNS.

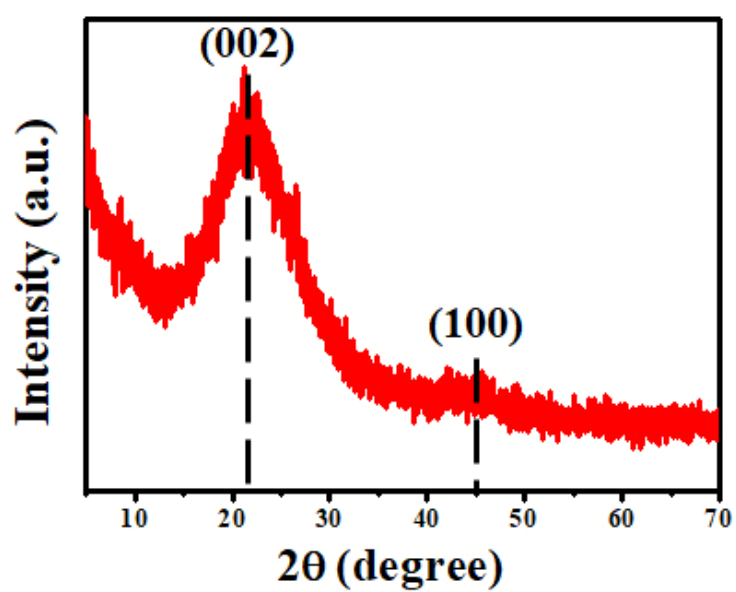

Figure S2. XRD pattern of HCNS.

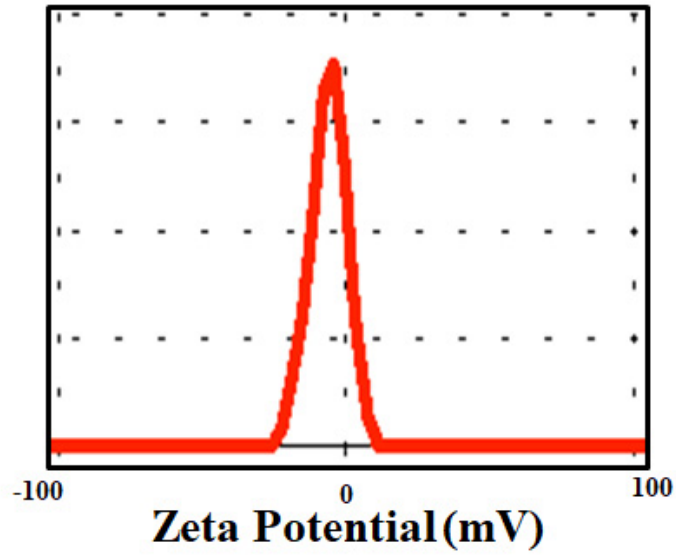

Figure S3. Zeta potential of HCNS.

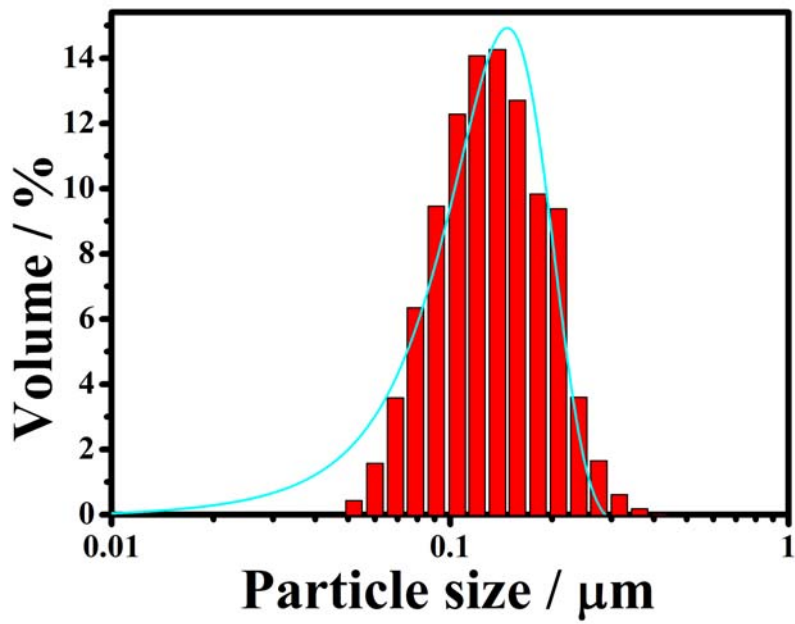

Figure S4. DLS measurement of HCNS.

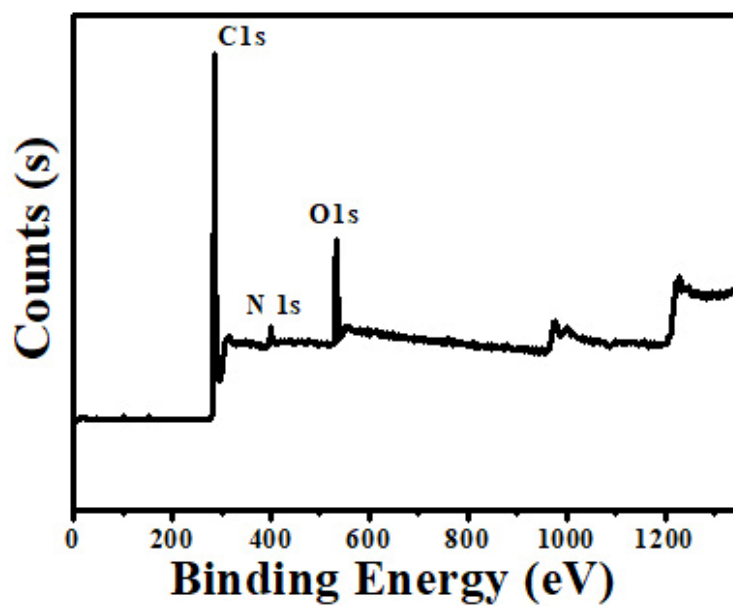

Figure S5. X-ray photoelectron survey spectra (XPS) spectrum of the HCNS.

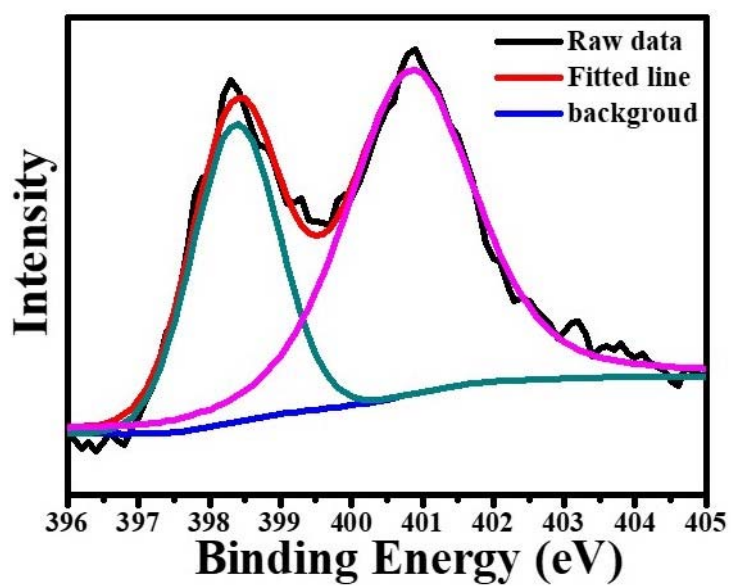

Figure S6. N 1s XPS spectra of HCNS.

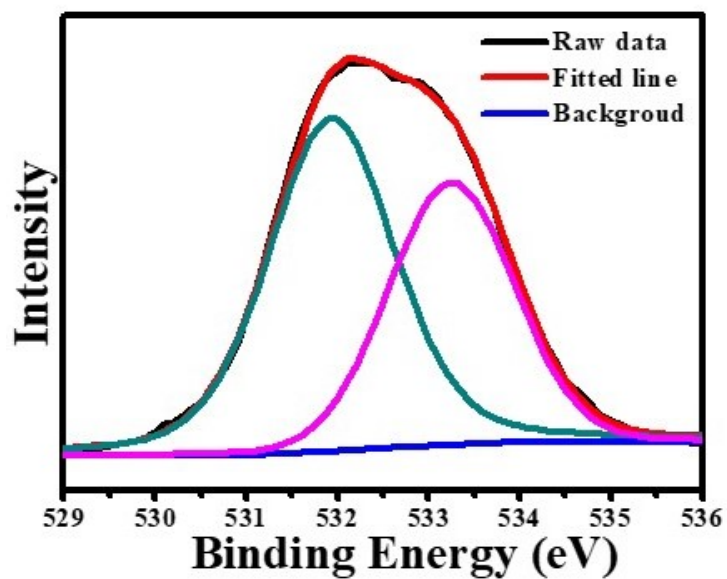

Figure S7. O 1s XPS spectra of HCNS.

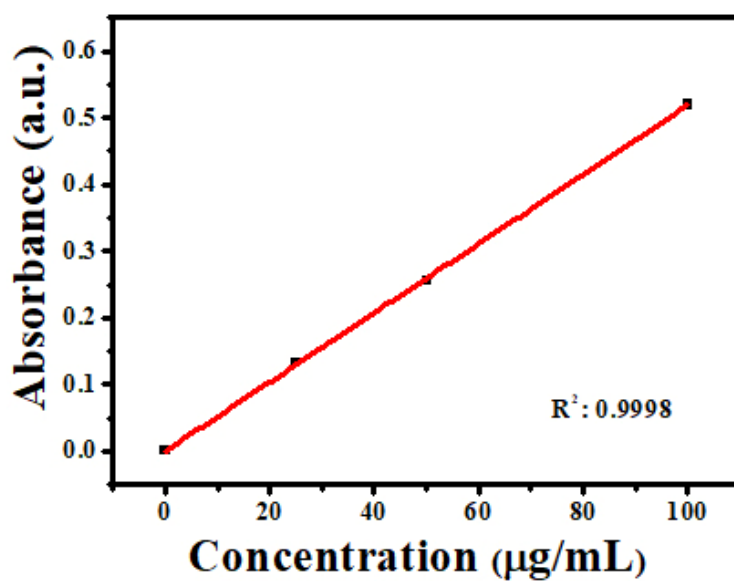

Figure S8. The fitting curve of the absorbance of HCNSs aqueous dispersions at 808 nm as a function of HCNSs concentrations; the correlation coefficient ( $R^2$ ) is 0.9998.

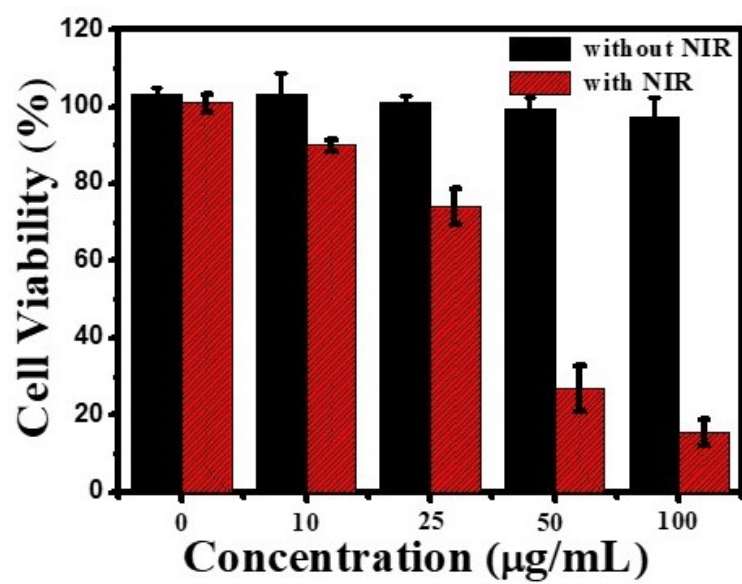

**Figure S9.** Cell viability of HepG-2 cells treated with HCNS with and without NIR irradiation (808 nm, 1.5 W, 10 min).

**Table S1** Photothermal conversion efficacy of several PTT agents.

|    | Agents                     | Wavelength (nm) | $\eta$ | Ref.      |
|----|----------------------------|-----------------|--------|-----------|
| 1  | UiO-66@PAN                 | 808             | 21.6   | 1         |
| 2  | SPN <sub>CT</sub>          | 808             | 35     | 2         |
| 3  | AuNR                       | 808             | 15.7   | 3         |
| 4  | AuNR                       | 808             | 61     | 4         |
| 5  | C-dots                     | 635             | 38.5   | 5         |
| 6  | Cu <sub>2-x</sub> Se       | 800             | 22     | 6         |
| 7  | ILAA NHCs                  | 808             | 32.89  | 7         |
| 8  | DTC cocrystal              | 808             | 18.8   | 8         |
| 9  | WO <sub>2.9</sub> Nanorods | 808             | 44.9   | 9         |
| 10 | Au-Ag nanourchins          | 808             | 80.4   | 10        |
| 11 | Graphene                   | 808             | 67     | 11        |
| 12 | Graphene oxide             | 808             | 58     | 11        |
| 13 | HCNS                       | 808             | 35.7   | This work |

## Photothermal Conversion Efficiency Measurement

To precisely evaluate the photothermal conversion efficiency ( $\eta$ ) of HCNS, which was calculated according to a literature method<sup>12</sup>:

$$\eta = \frac{hS(T_{max,HCNS} - T_{max,solvent}) - Q_0}{I(1 - 10^{-A_{808}})}$$

Where  $T_{max,HCNS}$  and  $T_{max,solvent}$  are maximum temperature for HCNS solution and water with irradiation.  $h$  is the transfer coefficient.  $S$  represents the surface area of the cuvette cell.  $Q_0$  is the heat input due to light absorption by the solvent.  $I$  is the irradiation laser power (1.5 W).  $A_{808}$  is the absorbance at 808 nm. For the calculation of  $hS$  following equation was used:

$$hS = \frac{\sum c_i m_i}{\tau_s}$$

Where  $m_i$  and  $c_i$  represent the mass and heat capacity of each element of the system, respectively (solvent (1.5 g, 4.2 J/(g $\times$ °C)), heating material (0.15 mg, 1.6 J/(g $\times$ °C)).<sup>11</sup> The heat capacity of HCNS was measured by the differential scanning calorimeter (PerkinElmer DSC8500). The sample system time constant ( $\tau_s$ ) was calculated using the equation:

$$\tau_s = -\frac{t}{\ln\theta}$$

Where  $t$  is time and  $\theta$  is the dimensionless driving force.



## References

1. W. Wang, L. Wang, Y. Li, S. Liu, Z. Xie and X. Jing, *Adv. Mater.*, 2016, **28**, 9320–9325.
2. X. Zhen, C. Xie and K. Pu, *Angew. Chem. Int. Ed.*, 2018, **57**, 3938–3942.
3. Q. Dong, X. Wang, X. Hu, L. Xiao, L. Zhang, L. Song, M. Xu, Y. Zou, L. Chen, Z. Chen and W. Tan, *Angew. Chem. Int. Ed.*, 2018, **57**, 177–181.
4. J. R. Cole, N. A. Mirin, M. W. Knight, G. P. Goodrich and N. J. Halas, *J. Phys. Chem. C*, 2009, **113**, 12090–12094.
5. J. Ge, Q. Jia, W. Liu, L. Guo, Q. Liu, M. Lan, H. Zhang, X. Meng and P. Wang, *Adv. Mater.*, 2015, **27**, 4169–4177.
6. C. M. Hessel, V. P. Pattani, M. Rasch, M. G. Panthani, B. Koo, J. W. Tunnell and B. A. Korgel, *Nano letters*, 2011, **11**, 2560–2566.
7. P. Tang, Y. Liu, Y. Liu, H. Meng, Z. Liu, K. Li and D. Wu, *Biomaterials*, 2019, **188**, 12–23.
8. Y. Wang, W. Zhu, W. Du, X. Liu, X. Zhang, H. Dong and W. Hu, *Angew. Chem. Int. Ed.*, 2018, **57**, 3963–3967.
9. L. Sun, Z. Li, R. Su, Y. Wang, Z. Li, B. Du, Y. Sun, P. Guan, F. Besenbacher and M. Yu, *Angew. Chem. Int. Ed.*, 2018, **57**, 1–7.
10. Z. Liu, L. Cheng, L. Zhang, Z. Yang, Z. Liu and J. Fang, *Biomaterials*, 2014, **35**, 4099–4107.
11. O. A. Savchuk, J. J. Carvajal, J. Massons, M. Aguilo, F. Díaz, *Carbon*, 2016, **103**, 134–141.
12. Q. Tian, F. Jiang, R. Zou, Q. Liu, Z. Chen, M. Zhu, S. Yang, J. Wang, J. Wang and J. Hu, *ACS Nano*, 2011, **5**, 9761–9771.
